# Supplementary material for: Structural Flexibility of the Monomeric Red Fluorescent Protein DsRed
Source: MDPI journal article supplement (doi:10.3390/cryst14010062), 2024-01-02
Supplement: s1 [file s1]

Archive with 1 entries (1 files):
- crystals-2794338-supplementary.pdf
