# Supplementary material for: Structural Flexibility of the Monomeric Red Fluorescent Protein DsRed
Source: MDPI journal article supplement (doi:10.3390/cryst14010062), 2024-01-02
Supplement: s1 [file s1 › crystals-2794338-supplementary.pdf]

# **Supplementary Data**

## **Structural flexibility of the monomeric red fluorescent protein DsRed**

Ki Hyun Nam\*

College of General Education, Kookmin University, Seoul, 02707, South Korea

\* Correspondence: [structure@kookmin.ac.kr](mailto:structure@kookmin.ac.kr)

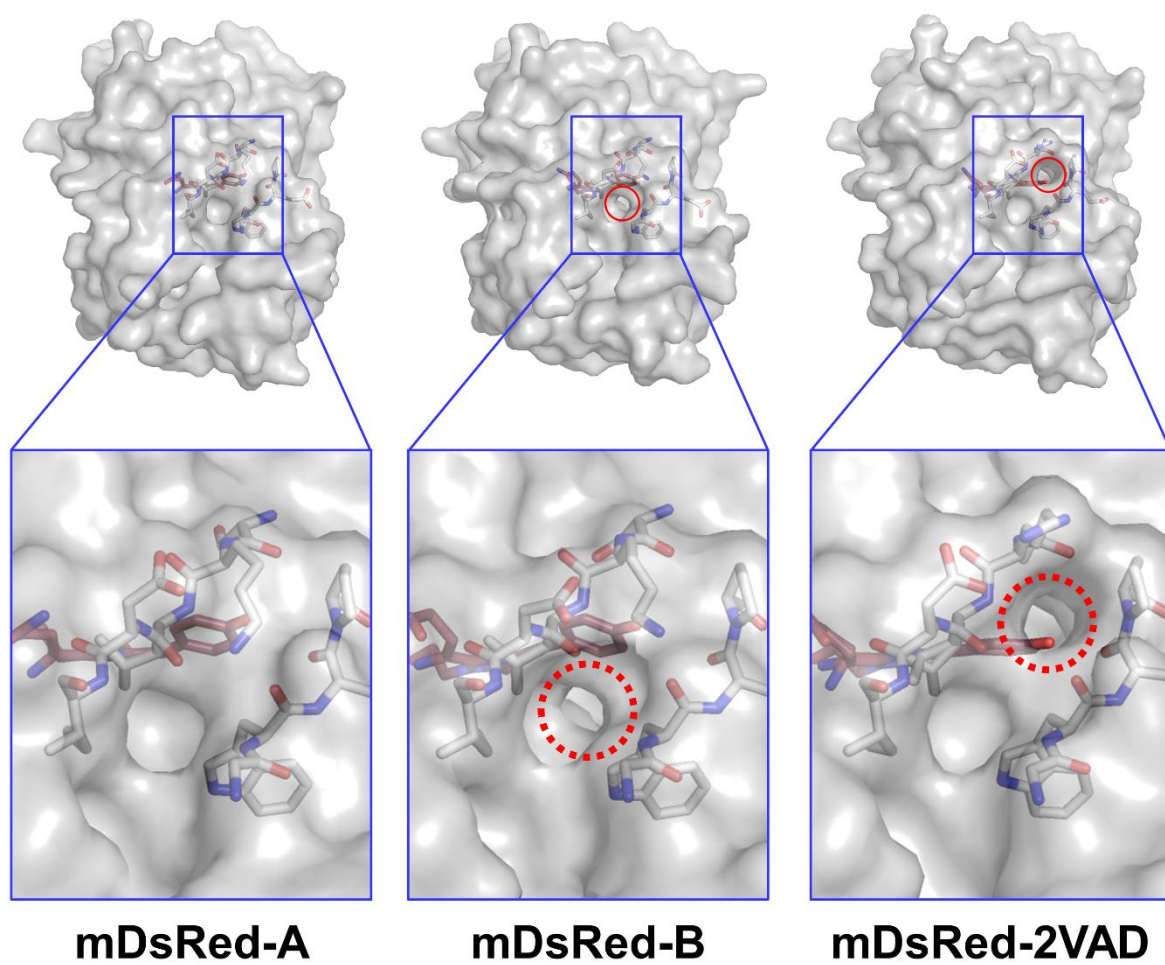

**Supplementary Figure S1.** Comparison of the surface structures of mDsRed-A, mDsRed-B, and mDsRed-2VAD. A hole connected with the chromophore was observed in mDsRed-B and mDsRed-2VAD.

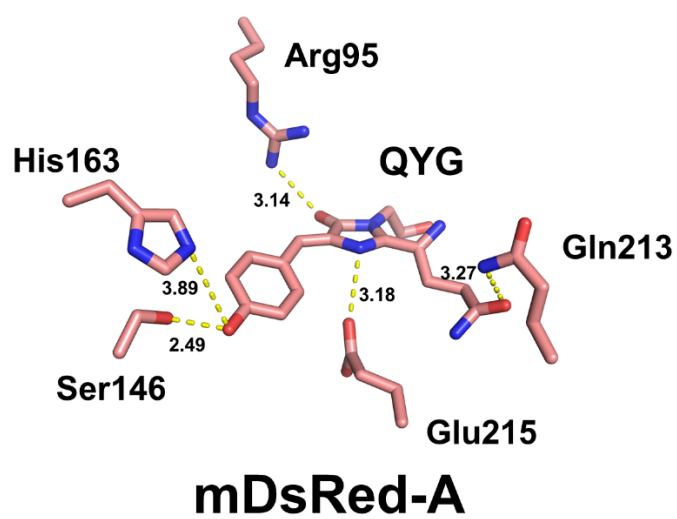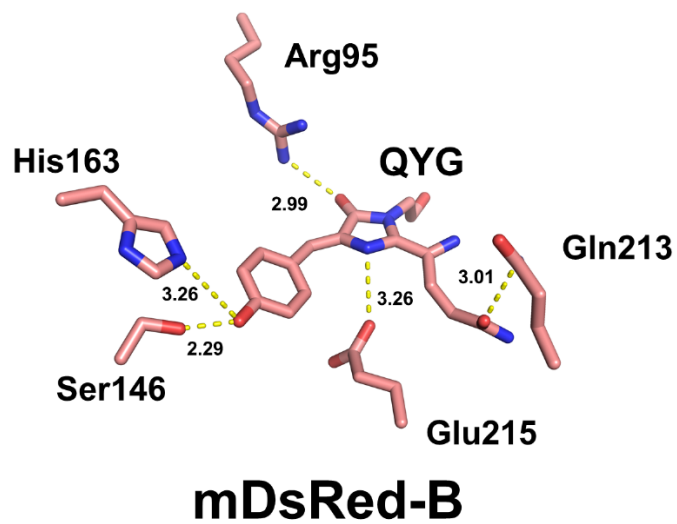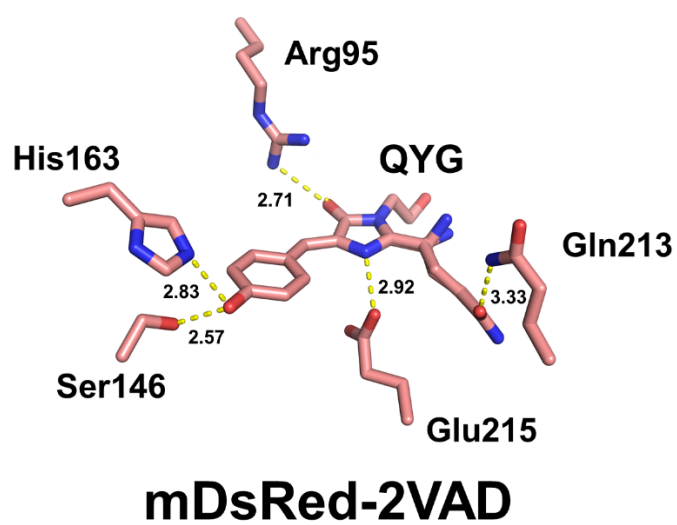

**Supplementary Figure S2.** Hydrogen bond network in the vicinity of the mDsRed chromophores.

**Table S1.** Interface summary analyzed by PDBePISA.

|                            | <b>mDsRed-A</b> |        | <b>mDsRed-B</b> |        |
|----------------------------|-----------------|--------|-----------------|--------|
| Number of atoms            |                 |        |                 |        |
| interface                  | 85              | 4.8%   | 79              | 4.5%   |
| surface                    | 962             | 54.8%  | 965             | 55.0%  |
| total                      | 1755            | 100.0% | 1755            | 100.0% |
| Number of residues         |                 |        |                 |        |
| interface                  | 24              | 11.0%  | 24              | 11.0%  |
| surface                    | 204             | 93.6%  | 208             | 95.4%  |
| total                      | 218             | 100.0% | 218             | 100.0% |
| Solvent-accessible area, Å |                 |        |                 |        |
| interface                  | 695.1           | 7.0%   | 686.3           | 7.0%   |
| total                      | 9871.5          | 100.0% | 9866.0          | 100.0% |
| Solvation energy, kcal/mol |                 |        |                 |        |
| isolated structure         | -207.8          | 100.0% | -203.3          | 100.0% |
| gain on complex formation  | 0.9             | -0.4%  | 0.2             | -0.1%  |
| average gain               | -0.8            | 0.4%   | -1.2            | 0.6%   |
| P-value                    | 0.743           |        | 0.709           |        |

**Table S2.** Interaction between mDsRed-A and mDsRed-B.

| <b>Hydrogen bonds</b>      |              |                            |
|----------------------------|--------------|----------------------------|
| mDsRed-A<br>residue [atom] | Distance (Å) | mDsRed-B<br>residue (atom) |
| Gly223 [O]                 | 2.52         | Lys36 [NZ]                 |
| Asp200 [OD1]               | 3.80         | Lys166 [NZ]                |
| Asp200 [OD1]               | 2.46         | Lys198 [NZ]                |
| Gly170 [O]                 | 3.67         | His204 [N]                 |
| Asp169 [O]                 | 3.73         | Glu206 [N]                 |
| Lys166 [NZ ]               | 2.28         | Asp200 [OD2]               |
| Lys166 [NZ]                | 2.98         | Ile201 [O]                 |
| His204 [N]                 | 3.24         | Gly170 [O]                 |
| <b>Salt bridges</b>        |              |                            |
| mDsRed-A<br>residue (atom) | Distance (Å) | mDsRed-B<br>residue (atom) |
| Gly223 [O]                 | 2.52         | Lys36 [NZ]                 |
| Asp200 [OD1]               | 3.80         | Lys166 [NZ]                |
| Asp200 [OD1]               | 2.46         | Lys198 [NZ]                |
| Lys166 [NZ]                | 2.28         | Asp200 [OD2]               |
